# Supplementary material for: Spatiotemporal Patterns of White Matter Maturation after Pre-Adolescence: A Diffusion Kurtosis Imaging Study
Source: MDPI journal article supplement (doi:10.3390/brainsci14050495), 2024-05-13
Supplement: s1 [file s1]

**Table S1.** Mean values (M) and standard deviations (SD) of DT parameters in various WM ROIs for adults and children.

| WM tract | FA              |                 | MD [ $\mu\text{m}^2/\text{ms}$ ] |                 | AD [ $\mu\text{m}^2/\text{ms}$ ] |                 | RD [ $\mu\text{m}^2/\text{ms}$ ] |                 |
|----------|-----------------|-----------------|----------------------------------|-----------------|----------------------------------|-----------------|----------------------------------|-----------------|
|          | adult           | child           | adult                            | child           | adult                            | child           | adult                            | child           |
|          | M $\pm$ SD      | M $\pm$ SD      | M $\pm$ SD                       | M $\pm$ SD      | M $\pm$ SD                       | M $\pm$ SD      | M $\pm$ SD                       | M $\pm$ SD      |
| MCP      | 0.45 $\pm$ 0.01 | 0.45 $\pm$ 0.01 | 0.94 $\pm$ 0.03                  | 0.97 $\pm$ 0.03 | 1.39 $\pm$ 0.05                  | 1.46 $\pm$ 0.04 | 0.71 $\pm$ 0.03                  | 0.73 $\pm$ 0.03 |
| PCT      | 0.42 $\pm$ 0.02 | 0.42 $\pm$ 0.02 | 0.82 $\pm$ 0.06                  | 0.91 $\pm$ 0.06 | 1.18 $\pm$ 0.07                  | 1.32 $\pm$ 0.07 | 0.64 $\pm$ 0.06                  | 0.70 $\pm$ 0.06 |
| GCC      | 0.54 $\pm$ 0.03 | 0.54 $\pm$ 0.02 | 1.06 $\pm$ 0.07                  | 1.05 $\pm$ 0.06 | 1.76 $\pm$ 0.08                  | 1.76 $\pm$ 0.09 | 0.70 $\pm$ 0.07                  | 0.69 $\pm$ 0.05 |
| BCC      | 0.55 $\pm$ 0.03 | 0.53 $\pm$ 0.03 | 1.16 $\pm$ 0.06                  | 1.16 $\pm$ 0.07 | 1.93 $\pm$ 0.07                  | 1.90 $\pm$ 0.07 | 0.78 $\pm$ 0.07                  | 0.78 $\pm$ 0.07 |
| SCC      | 0.59 $\pm$ 0.02 | 0.59 $\pm$ 0.02 | 1.09 $\pm$ 0.06                  | 1.09 $\pm$ 0.04 | 1.88 $\pm$ 0.08                  | 1.88 $\pm$ 0.05 | 0.70 $\pm$ 0.05                  | 0.69 $\pm$ 0.04 |
| FCB      | 0.38 $\pm$ 0.04 | 0.40 $\pm$ 0.05 | 2.15 $\pm$ 0.25                  | 1.89 $\pm$ 0.19 | 3.00 $\pm$ 0.25                  | 2.71 $\pm$ 0.19 | 1.72 $\pm$ 0.27                  | 1.48 $\pm$ 0.20 |
| CST      | 0.50 $\pm$ 0.02 | 0.48 $\pm$ 0.02 | 0.94 $\pm$ 0.05                  | 0.96 $\pm$ 0.04 | 1.47 $\pm$ 0.07                  | 1.46 $\pm$ 0.06 | 0.67 $\pm$ 0.05                  | 0.70 $\pm$ 0.04 |
| ML       | 0.53 $\pm$ 0.02 | 0.52 $\pm$ 0.02 | 0.88 $\pm$ 0.05                  | 0.90 $\pm$ 0.03 | 1.47 $\pm$ 0.10                  | 1.49 $\pm$ 0.04 | 0.59 $\pm$ 0.04                  | 0.61 $\pm$ 0.03 |
| ICP      | 0.44 $\pm$ 0.02 | 0.41 $\pm$ 0.03 | 0.96 $\pm$ 0.03                  | 0.97 $\pm$ 0.03 | 1.45 $\pm$ 0.04                  | 1.42 $\pm$ 0.03 | 0.72 $\pm$ 0.04                  | 0.74 $\pm$ 0.04 |
| SCP      | 0.55 $\pm$ 0.02 | 0.52 $\pm$ 0.02 | 1.33 $\pm$ 0.08                  | 1.36 $\pm$ 0.07 | 2.15 $\pm$ 0.10                  | 2.15 $\pm$ 0.08 | 0.92 $\pm$ 0.08                  | 0.97 $\pm$ 0.07 |
| CP       | 0.57 $\pm$ 0.02 | 0.59 $\pm$ 0.02 | 1.02 $\pm$ 0.06                  | 1.01 $\pm$ 0.03 | 1.73 $\pm$ 0.06                  | 1.77 $\pm$ 0.05 | 0.66 $\pm$ 0.06                  | 0.64 $\pm$ 0.04 |
| ALIC     | 0.52 $\pm$ 0.02 | 0.49 $\pm$ 0.02 | 0.84 $\pm$ 0.06                  | 0.83 $\pm$ 0.03 | 1.36 $\pm$ 0.07                  | 1.35 $\pm$ 0.04 | 0.57 $\pm$ 0.05                  | 0.58 $\pm$ 0.02 |
| PLIC     | 0.63 $\pm$ 0.02 | 0.64 $\pm$ 0.02 | 0.78 $\pm$ 0.03                  | 0.82 $\pm$ 0.03 | 1.43 $\pm$ 0.04                  | 1.52 $\pm$ 0.06 | 0.46 $\pm$ 0.03                  | 0.46 $\pm$ 0.03 |
| RPIC     | 0.55 $\pm$ 0.02 | 0.57 $\pm$ 0.02 | 0.91 $\pm$ 0.03                  | 0.92 $\pm$ 0.04 | 1.52 $\pm$ 0.05                  | 1.58 $\pm$ 0.06 | 0.61 $\pm$ 0.04                  | 0.59 $\pm$ 0.04 |
| ACR      | 0.43 $\pm$ 0.03 | 0.44 $\pm$ 0.02 | 0.86 $\pm$ 0.05                  | 0.88 $\pm$ 0.03 | 1.28 $\pm$ 0.05                  | 1.33 $\pm$ 0.04 | 0.65 $\pm$ 0.05                  | 0.66 $\pm$ 0.03 |
| SCR      | 0.48 $\pm$ 0.02 | 0.49 $\pm$ 0.02 | 0.82 $\pm$ 0.04                  | 0.83 $\pm$ 0.04 | 1.27 $\pm$ 0.06                  | 1.32 $\pm$ 0.06 | 0.59 $\pm$ 0.04                  | 0.59 $\pm$ 0.04 |
| PSR      | 0.44 $\pm$ 0.02 | 0.46 $\pm$ 0.02 | 0.92 $\pm$ 0.05                  | 0.94 $\pm$ 0.04 | 1.39 $\pm$ 0.07                  | 1.45 $\pm$ 0.05 | 0.69 $\pm$ 0.05                  | 0.68 $\pm$ 0.04 |
| PTR      | 0.50 $\pm$ 0.02 | 0.52 $\pm$ 0.02 | 0.96 $\pm$ 0.04                  | 1.00 $\pm$ 0.04 | 1.55 $\pm$ 0.06                  | 1.63 $\pm$ 0.06 | 0.67 $\pm$ 0.04                  | 0.68 $\pm$ 0.04 |
| SS       | 0.49 $\pm$ 0.03 | 0.49 $\pm$ 0.02 | 0.97 $\pm$ 0.06                  | 1.00 $\pm$ 0.04 | 1.53 $\pm$ 0.08                  | 1.56 $\pm$ 0.05 | 0.69 $\pm$ 0.06                  | 0.71 $\pm$ 0.04 |
| EC       | 0.40 $\pm$ 0.02 | 0.40 $\pm$ 0.01 | 0.94 $\pm$ 0.05                  | 0.89 $\pm$ 0.02 | 1.37 $\pm$ 0.06                  | 1.29 $\pm$ 0.03 | 0.73 $\pm$ 0.05                  | 0.68 $\pm$ 0.02 |
| Cg       | 0.39 $\pm$ 0.02 | 0.37 $\pm$ 0.02 | 0.93 $\pm$ 0.03                  | 0.92 $\pm$ 0.03 | 1.36 $\pm$ 0.04                  | 1.31 $\pm$ 0.07 | 0.72 $\pm$ 0.03                  | 0.72 $\pm$ 0.03 |
| Ch       | 0.37 $\pm$ 0.02 | 0.35 $\pm$ 0.02 | 0.91 $\pm$ 0.03                  | 0.94 $\pm$ 0.03 | 1.27 $\pm$ 0.05                  | 1.31 $\pm$ 0.04 | 0.72 $\pm$ 0.02                  | 0.75 $\pm$ 0.04 |
| FST      | 0.46 $\pm$ 0.03 | 0.47 $\pm$ 0.02 | 1.05 $\pm$ 0.06                  | 1.08 $\pm$ 0.05 | 1.59 $\pm$ 0.07                  | 1.67 $\pm$ 0.07 | 0.79 $\pm$ 0.07                  | 0.79 $\pm$ 0.05 |
| SLF      | 0.44 $\pm$ 0.02 | 0.43 $\pm$ 0.02 | 0.87 $\pm$ 0.04                  | 0.87 $\pm$ 0.03 | 1.29 $\pm$ 0.04                  | 1.29 $\pm$ 0.04 | 0.66 $\pm$ 0.04                  | 0.66 $\pm$ 0.03 |
| SFOF     | 0.47 $\pm$ 0.03 | 0.47 $\pm$ 0.03 | 0.81 $\pm$ 0.07                  | 0.81 $\pm$ 0.06 | 1.26 $\pm$ 0.09                  | 1.26 $\pm$ 0.08 | 0.59 $\pm$ 0.06                  | 0.58 $\pm$ 0.05 |
| UF       | 0.41 $\pm$ 0.02 | 0.39 $\pm$ 0.02 | 0.90 $\pm$ 0.04                  | 0.92 $\pm$ 0.02 | 1.32 $\pm$ 0.05                  | 1.34 $\pm$ 0.04 | 0.69 $\pm$ 0.04                  | 0.71 $\pm$ 0.03 |
| Tapetum  | 0.43 $\pm$ 0.02 | 0.41 $\pm$ 0.03 | 1.61 $\pm$ 0.16                  | 1.71 $\pm$ 0.14 | 2.30 $\pm$ 0.20                  | 2.41 $\pm$ 0.16 | 1.27 $\pm$ 0.14                  | 1.35 $\pm$ 0.13 |

**Table S2.** Mean values (M) and standard deviations (SD) of KT parameters in various WM ROIs for adults and children.

|          | KA              |                 | MK              |                 | AK              |                 | RK              |                 |
|----------|-----------------|-----------------|-----------------|-----------------|-----------------|-----------------|-----------------|-----------------|
|          | adult           | child           | adult           | child           | adult           | child           | adult           | child           |
| WM tract | M $\pm$ SD      |
| MCP      | 0.44 $\pm$ 0.02 | 0.37 $\pm$ 0.03 | 1.15 $\pm$ 0.05 | 1.05 $\pm$ 0.04 | 0.77 $\pm$ 0.04 | 0.73 $\pm$ 0.02 | 1.46 $\pm$ 0.06 | 1.28 $\pm$ 0.07 |
| PCT      | 0.42 $\pm$ 0.04 | 0.35 $\pm$ 0.03 | 1.25 $\pm$ 0.07 | 1.08 $\pm$ 0.04 | 0.90 $\pm$ 0.04 | 0.82 $\pm$ 0.03 | 1.62 $\pm$ 0.11 | 1.39 $\pm$ 0.09 |
| GCC      | 0.42 $\pm$ 0.04 | 0.41 $\pm$ 0.04 | 0.97 $\pm$ 0.05 | 0.92 $\pm$ 0.04 | 0.63 $\pm$ 0.03 | 0.57 $\pm$ 0.02 | 1.34 $\pm$ 0.11 | 1.25 $\pm$ 0.07 |
| BCC      | 0.42 $\pm$ 0.04 | 0.39 $\pm$ 0.04 | 0.93 $\pm$ 0.05 | 0.92 $\pm$ 0.05 | 0.61 $\pm$ 0.03 | 0.56 $\pm$ 0.02 | 1.27 $\pm$ 0.12 | 1.26 $\pm$ 0.08 |
| SCC      | 0.49 $\pm$ 0.04 | 0.42 $\pm$ 0.04 | 1.04 $\pm$ 0.05 | 0.98 $\pm$ 0.04 | 0.58 $\pm$ 0.03 | 0.53 $\pm$ 0.02 | 1.47 $\pm$ 0.10 | 1.32 $\pm$ 0.09 |
| FCB      | 0.14 $\pm$ 0.03 | 0.16 $\pm$ 0.04 | 0.64 $\pm$ 0.05 | 0.64 $\pm$ 0.05 | 0.50 $\pm$ 0.03 | 0.51 $\pm$ 0.02 | 0.79 $\pm$ 0.08 | 0.81 $\pm$ 0.09 |
| CST      | 0.47 $\pm$ 0.03 | 0.40 $\pm$ 0.03 | 1.20 $\pm$ 0.06 | 1.09 $\pm$ 0.04 | 0.76 $\pm$ 0.04 | 0.74 $\pm$ 0.03 | 1.68 $\pm$ 0.10 | 1.44 $\pm$ 0.09 |
| ML       | 0.43 $\pm$ 0.03 | 0.40 $\pm$ 0.04 | 1.12 $\pm$ 0.06 | 1.01 $\pm$ 0.05 | 0.73 $\pm$ 0.04 | 0.69 $\pm$ 0.03 | 1.56 $\pm$ 0.10 | 1.40 $\pm$ 0.11 |
| ICP      | 0.35 $\pm$ 0.02 | 0.29 $\pm$ 0.03 | 1.05 $\pm$ 0.05 | 0.94 $\pm$ 0.03 | 0.78 $\pm$ 0.04 | 0.74 $\pm$ 0.02 | 1.29 $\pm$ 0.08 | 1.11 $\pm$ 0.06 |
| SCP      | 0.40 $\pm$ 0.03 | 0.33 $\pm$ 0.03 | 1.00 $\pm$ 0.05 | 0.93 $\pm$ 0.04 | 0.58 $\pm$ 0.03 | 0.56 $\pm$ 0.02 | 1.36 $\pm$ 0.07 | 1.21 $\pm$ 0.07 |
| CP       | 0.50 $\pm$ 0.04 | 0.45 $\pm$ 0.05 | 1.17 $\pm$ 0.06 | 1.05 $\pm$ 0.05 | 0.64 $\pm$ 0.04 | 0.57 $\pm$ 0.02 | 1.65 $\pm$ 0.10 | 1.41 $\pm$ 0.10 |
| ALIC     | 0.46 $\pm$ 0.04 | 0.41 $\pm$ 0.03 | 1.05 $\pm$ 0.05 | 0.94 $\pm$ 0.04 | 0.69 $\pm$ 0.03 | 0.64 $\pm$ 0.01 | 1.37 $\pm$ 0.08 | 1.24 $\pm$ 0.07 |
| PLIC     | 0.55 $\pm$ 0.03 | 0.50 $\pm$ 0.04 | 1.18 $\pm$ 0.06 | 1.07 $\pm$ 0.06 | 0.67 $\pm$ 0.03 | 0.58 $\pm$ 0.03 | 1.67 $\pm$ 0.11 | 1.48 $\pm$ 0.12 |
| RPIC     | 0.46 $\pm$ 0.03 | 0.43 $\pm$ 0.04 | 1.11 $\pm$ 0.05 | 1.00 $\pm$ 0.05 | 0.75 $\pm$ 0.04 | 0.66 $\pm$ 0.02 | 1.42 $\pm$ 0.10 | 1.28 $\pm$ 0.08 |
| ACR      | 0.36 $\pm$ 0.04 | 0.35 $\pm$ 0.03 | 1.02 $\pm$ 0.05 | 0.93 $\pm$ 0.04 | 0.80 $\pm$ 0.03 | 0.74 $\pm$ 0.02 | 1.20 $\pm$ 0.07 | 1.09 $\pm$ 0.06 |
| SCR      | 0.41 $\pm$ 0.03 | 0.39 $\pm$ 0.04 | 1.11 $\pm$ 0.04 | 1.02 $\pm$ 0.05 | 0.82 $\pm$ 0.03 | 0.74 $\pm$ 0.02 | 1.38 $\pm$ 0.07 | 1.29 $\pm$ 0.08 |
| PSR      | 0.37 $\pm$ 0.03 | 0.33 $\pm$ 0.03 | 1.01 $\pm$ 0.05 | 0.91 $\pm$ 0.04 | 0.78 $\pm$ 0.04 | 0.71 $\pm$ 0.03 | 1.23 $\pm$ 0.07 | 1.11 $\pm$ 0.07 |
| PTR      | 0.41 $\pm$ 0.03 | 0.39 $\pm$ 0.04 | 0.97 $\pm$ 0.05 | 0.88 $\pm$ 0.04 | 0.72 $\pm$ 0.04 | 0.64 $\pm$ 0.02 | 1.21 $\pm$ 0.08 | 1.08 $\pm$ 0.08 |
| SS       | 0.36 $\pm$ 0.03 | 0.35 $\pm$ 0.04 | 1.01 $\pm$ 0.06 | 0.89 $\pm$ 0.04 | 0.78 $\pm$ 0.05 | 0.70 $\pm$ 0.02 | 1.18 $\pm$ 0.08 | 1.04 $\pm$ 0.07 |
| EC       | 0.31 $\pm$ 0.03 | 0.30 $\pm$ 0.02 | 0.91 $\pm$ 0.04 | 0.76 $\pm$ 0.04 | 0.76 $\pm$ 0.03 | 0.68 $\pm$ 0.02 | 1.04 $\pm$ 0.07 | 0.83 $\pm$ 0.06 |
| Cg       | 0.35 $\pm$ 0.02 | 0.30 $\pm$ 0.02 | 0.95 $\pm$ 0.04 | 0.80 $\pm$ 0.03 | 0.78 $\pm$ 0.04 | 0.72 $\pm$ 0.02 | 1.12 $\pm$ 0.08 | 0.90 $\pm$ 0.06 |
| Ch       | 0.33 $\pm$ 0.03 | 0.26 $\pm$ 0.02 | 0.98 $\pm$ 0.08 | 0.74 $\pm$ 0.04 | 0.82 $\pm$ 0.05 | 0.69 $\pm$ 0.03 | 1.10 $\pm$ 0.10 | 0.81 $\pm$ 0.05 |
| FST      | 0.35 $\pm$ 0.03 | 0.32 $\pm$ 0.03 | 1.00 $\pm$ 0.06 | 0.88 $\pm$ 0.04 | 0.75 $\pm$ 0.05 | 0.64 $\pm$ 0.02 | 1.17 $\pm$ 0.10 | 1.07 $\pm$ 0.07 |
| SLF      | 0.38 $\pm$ 0.03 | 0.36 $\pm$ 0.03 | 1.05 $\pm$ 0.04 | 0.95 $\pm$ 0.03 | 0.83 $\pm$ 0.04 | 0.77 $\pm$ 0.03 | 1.24 $\pm$ 0.06 | 1.10 $\pm$ 0.05 |
| SFOF     | 0.47 $\pm$ 0.06 | 0.40 $\pm$ 0.05 | 1.09 $\pm$ 0.07 | 0.96 $\pm$ 0.04 | 0.74 $\pm$ 0.04 | 0.68 $\pm$ 0.02 | 1.40 $\pm$ 0.11 | 1.19 $\pm$ 0.08 |
| UF       | 0.31 $\pm$ 0.03 | 0.27 $\pm$ 0.02 | 0.85 $\pm$ 0.05 | 0.72 $\pm$ 0.03 | 0.73 $\pm$ 0.04 | 0.63 $\pm$ 0.03 | 0.92 $\pm$ 0.09 | 0.77 $\pm$ 0.05 |
| Tapetum  | 0.24 $\pm$ 0.03 | 0.20 $\pm$ 0.03 | 0.65 $\pm$ 0.08 | 0.63 $\pm$ 0.05 | 0.55 $\pm$ 0.04 | 0.54 $\pm$ 0.02 | 0.75 $\pm$ 0.13 | 0.70 $\pm$ 0.09 |
